# Supplementary material for: Enhanced electrochemical performances based on ZnSnO3 microcubes functionalized in-doped carbon nanofibers as free-standing anode materials
Source: Royal Society of Chemistry journal article supplement (doi:10.1039/d3dt01642k), 2023-01-01
Supplement: d3dt01642k1.pdf [file d3dt01642k1.pdf]

## Supplementary Information

### Enhanced electrochemical performances based on ZnSnO<sub>3</sub> microcubes functionalized in-doped carbon nanofibers as free-standing anode materials

Xiaoqiang Li <sup>a,b</sup>, Guangguang Guan <sup>c,d</sup>, Chuanjin Yu <sup>b</sup>, Bingjie Cheng <sup>b</sup>, Xin Chen <sup>a</sup>, Kaiyin Zhang <sup>e</sup>, Jun Xiang <sup>a,\*</sup>

<sup>a</sup> *School of Science, Jiangsu University of Science and Technology, Zhenjiang 212100, China*

<sup>b</sup> *Institute of Materials Science and Engineering, Beijing University of Technology, Beijing 100124, China*

<sup>c</sup> *Shenyang National Laboratory for Materials Science, Institute of Metal Research, Chinese Academy of Sciences, Shenyang 110016, China*

<sup>d</sup> *School of Materials Science and Engineering, University of Science and Technology of China, Shenyang 110016, China*

<sup>e</sup> *College of mechanical and electrical engineering, Wuyi University, Wuyishan 354300, China*

\*Corresponding author.

*E-mail address: jxiang@just.edu.cn (J. Xiang).*

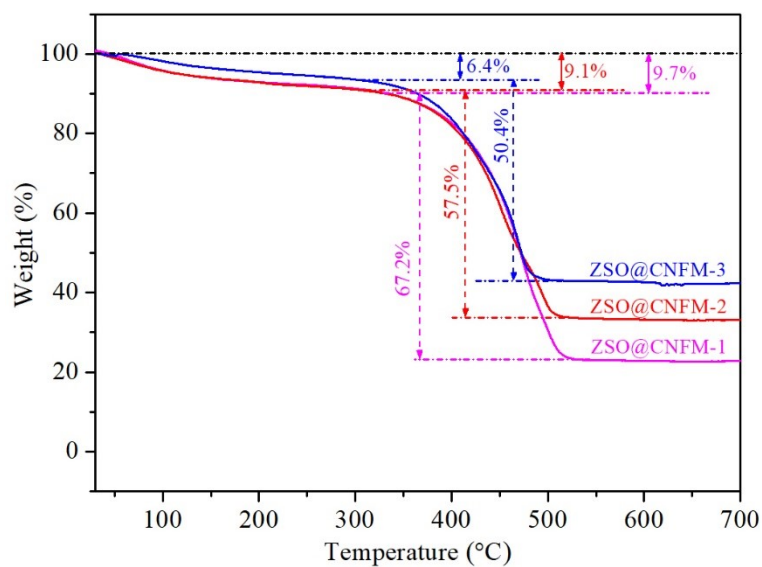

**Fig. S1.** TG curves of ZSO@CNFM-1, ZSO@CNFM-2 and ZSO@CNFM-3.

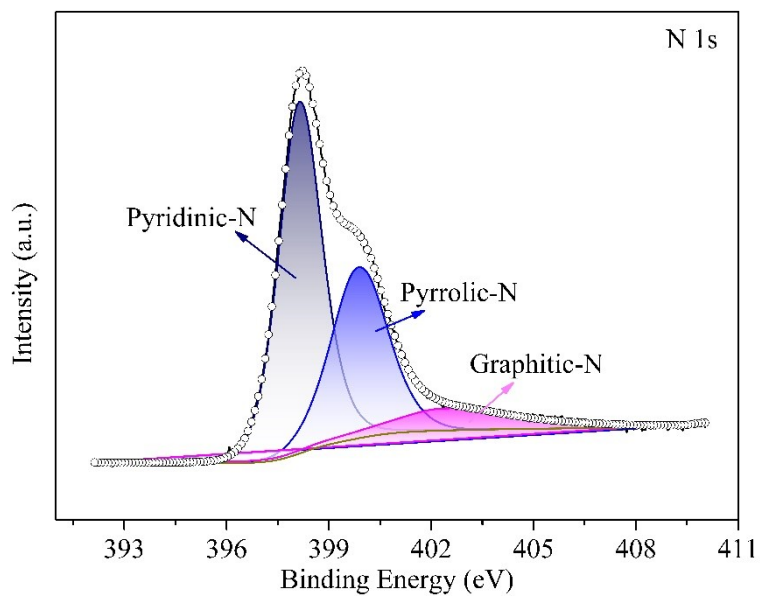

**Fig. S2.** High-resolution N 1s spectra of ZSO@CNFM-2.

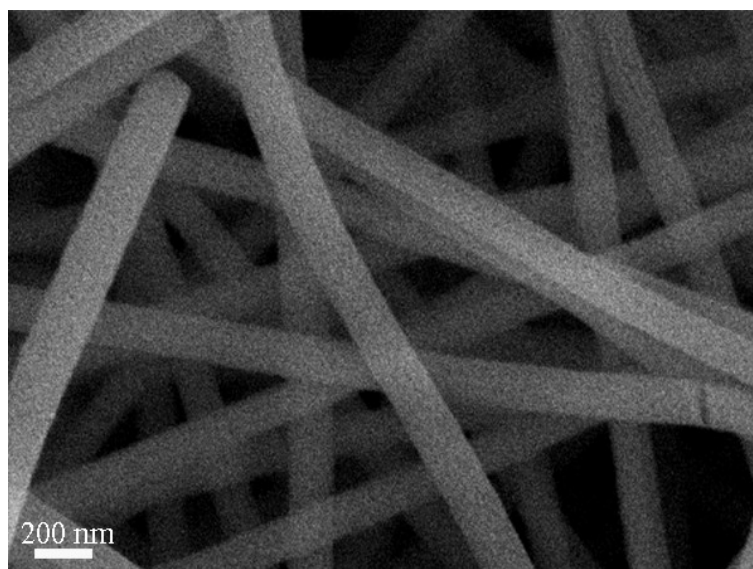

**Fig. S3.** SEM image of CNFM.

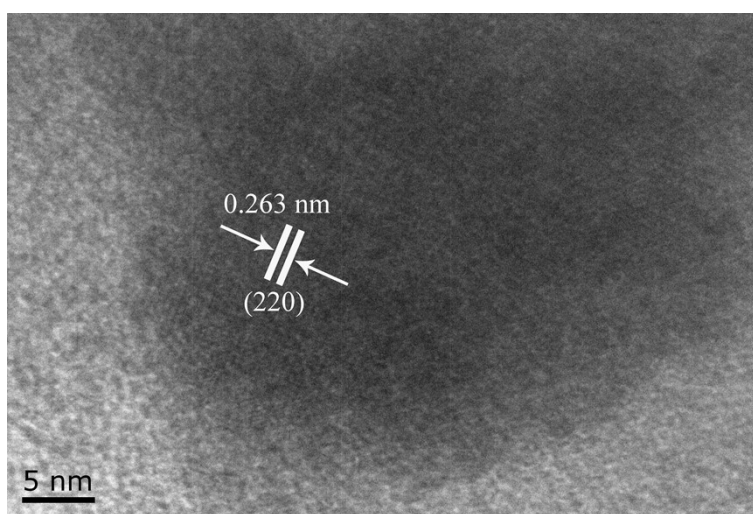

**Fig. S4.** HRTEM image of ZSO@CNFM-2

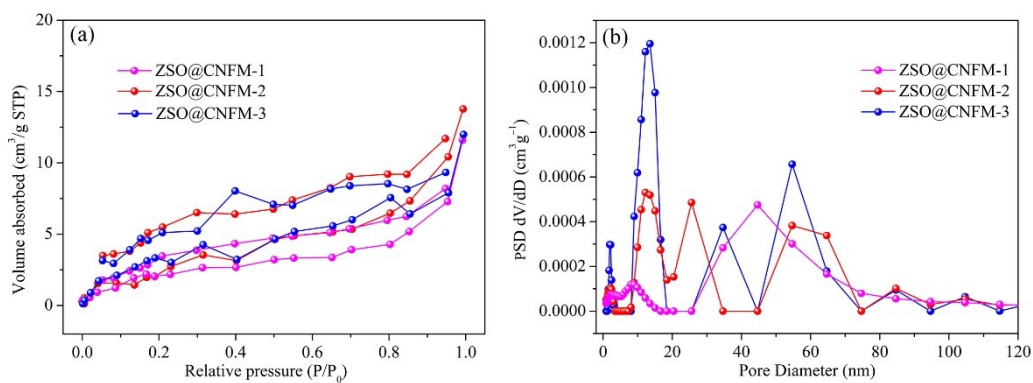

**Fig. S5.** (a) Nitrogen adsorption-desorption isotherms and (b) pore-size distributions of ZSO@CNFM-1, ZSO@CNFM-2 and ZSO@CNFM-3.

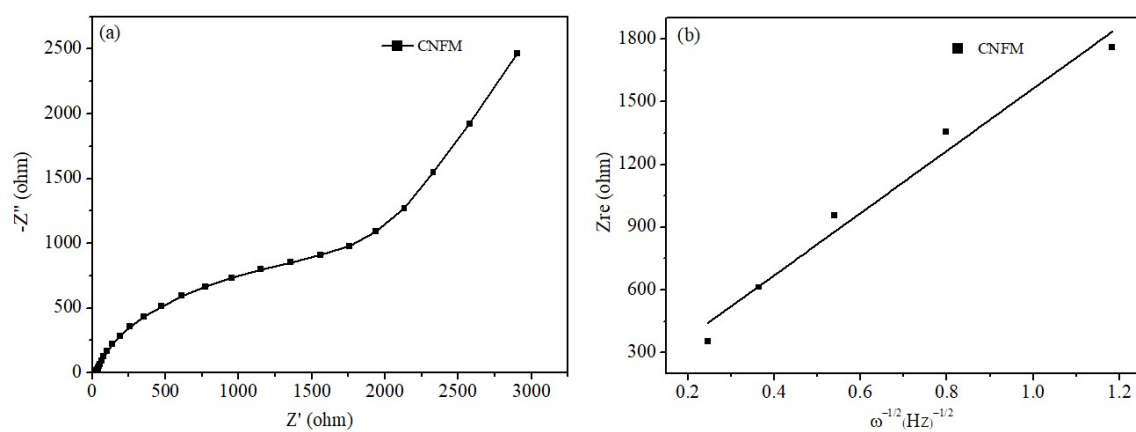

**Fig. S6.** (a) Nyquist plot and (b) corresponding  $Z_{re}$  vs.  $\omega^{-1/2}$  plot in the low-frequency range for the CNFM electrode.

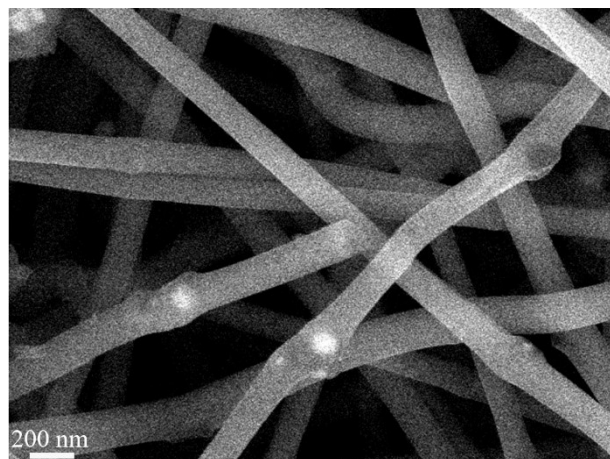

**Fig. S7.** SEM image of ZSO@CNFM-2 after 100 cycles at  $100 \text{ mA g}^{-1}$ .
